# Supplementary material for: Clinical Characteristics of Ovarian Cancer Classified by BRCA1, BRCA2, and RAD51C Status
Source: PubMed Central journal article supplement — Sci Rep. 2014 Feb 7;4:4026. doi: 10.1038/srep04026 (PMC4168524; doi:10.1038/srep04026), 2014-02-07
Supplement: srep04026-s1.pdf [file srep04026-s1.pdf]

## Clinical Characteristics of Ovarian Cancer Classified by *BRCA1*, *BRCA2*, and *RAD51C* Status

Julie M. Cunningham, Mine S. Cicek, Nicholas B. Larson, Jaime Davila, Chen Wang, Melissa Larson, Honglin Song, Ed Dicks, Patricia Harrington, Myra Wick, Boris J. Winterhoff, Habib Hamidi, Gottfried Konecny, Jeremy Chien, Marina Bibikova, Jian-Bing Fan, Kimberly R. Kalli, Noralane M. Lindor, Brooke L. Fridley, Paul P.D. Pharoah, and Ellen L. Goode

### SUPPLEMENTAL FIGURES

Figure S1. Bioinformatics workflow for somatic sequences

Figure S1

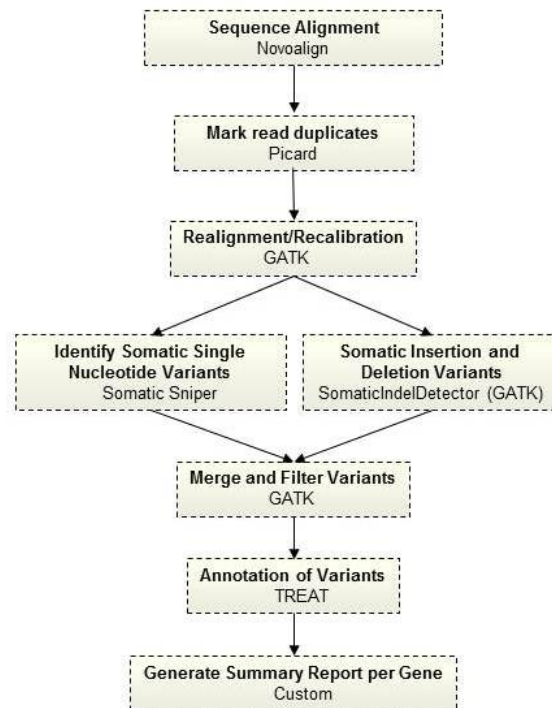

Bold indicates process; non-bold indicates software.

**Figure S2. Selection of BRCA1 methylation probes**

21 CpG probes (between 41,277,006 and 41,277,847 bp on chromosome 17)

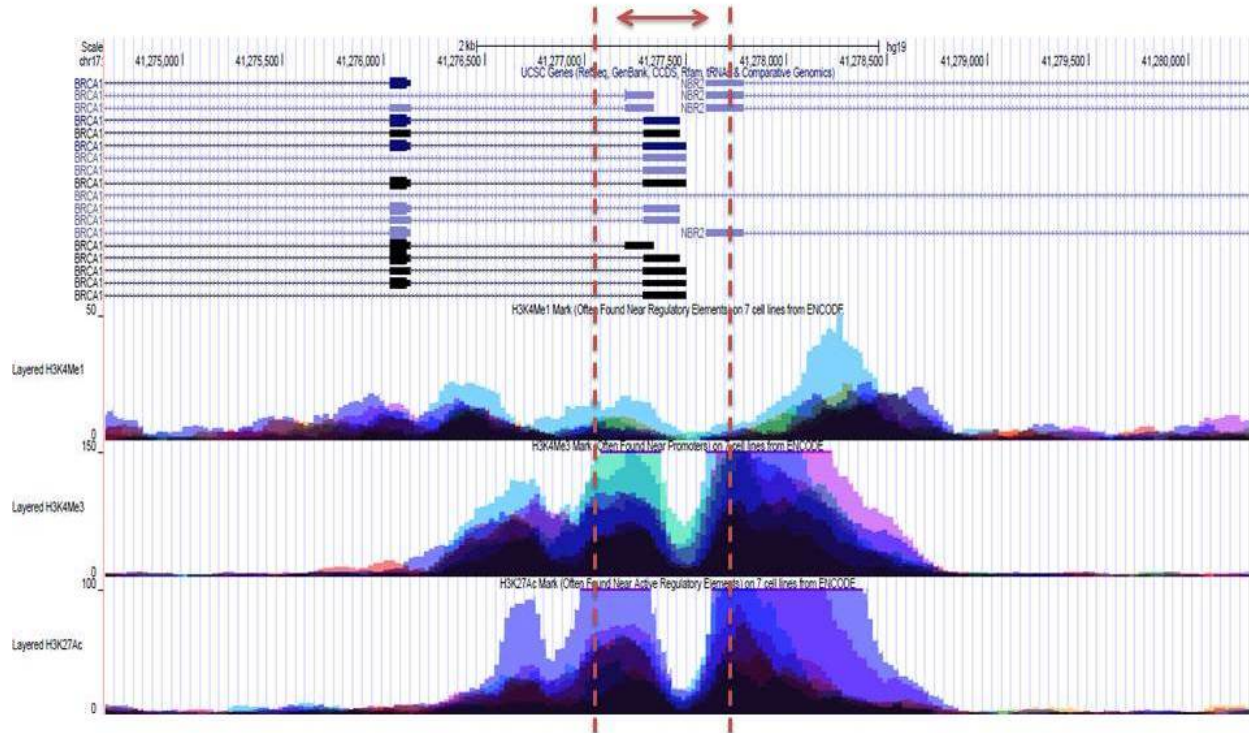

Figure S2.A.

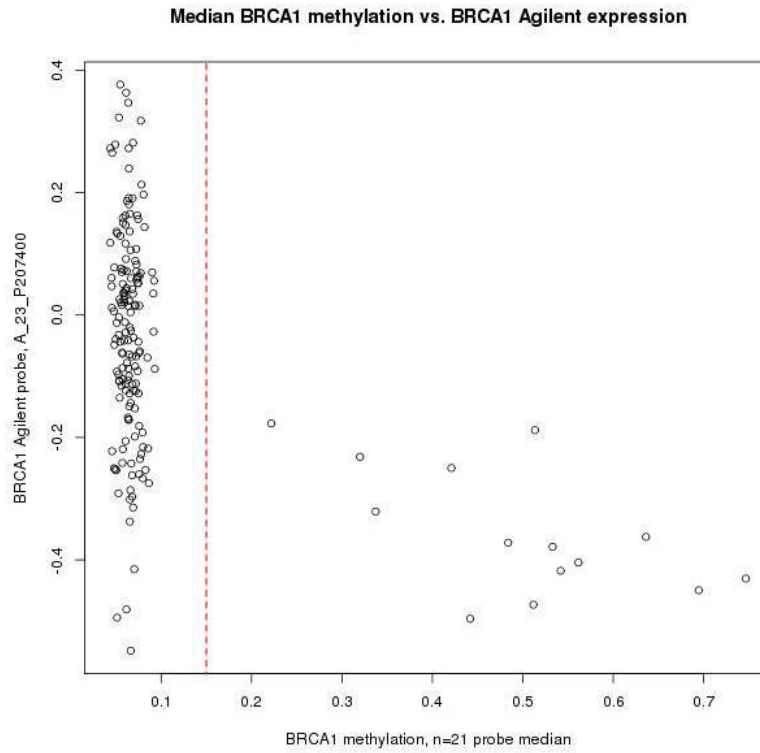

Figure S2.B.

A. UCSC Genome Browser view of the 21 CpG probes around chromosome 17 BRCA1 region (41,277,006 bp to 41,277,847 bp).

The genomic range of CpG probes are indicated between red dashed lines. The three tracks show promoter- and regulatory element-associated histone marks identified in cell-line studies within the ENCODE project, supporting the likely regulation roles of this region.

B. Median BRCA1 Methylation versus BRCA1 Expression.

For 171 patients with methylation and expression data (Illumina Methylation 450k Array and Agilent Whole Human Genome 4x44K Expression Array, respectively), BRCA1 expression probe value is plotted against the mean of 21 CpG probes (between 41,277,006 and 41,277,847 bp on chromosome 17) which were found to correlate with expression. A threshold of median CpG beta of 0.15 (red line) was then applied to the overall patient set to define BRCA1 methylated tumors.

**Figure S3. Time to recurrence for high grade serous EOC by HRD and type of alteration**

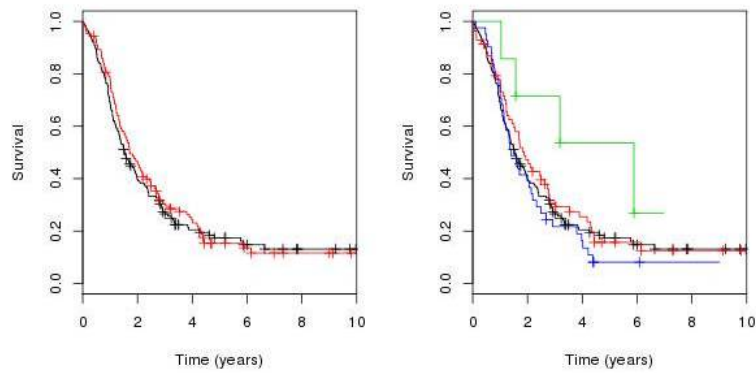

A. Red: HRD; Black: NAD.

B. Red: germline deleterious mutation; Green: somatic deleterious mutation; Blue: somatic methylation; Black: no germline mutation, somatic mutation or methylation.

**Table S1. Catalog of germline mutations found among N=912 epithelial ovarian cancer patients**

| Gene  | Chr | Start    | Stop     | Reference Allele | Alternate Allele | Exon   | Protein Change     | Type                 | Rsid (dbSNP 132) | Classification       |
|-------|-----|----------|----------|------------------|------------------|--------|--------------------|----------------------|------------------|----------------------|
| BRCA1 | 17  | 41197728 | 41197728 | -                | T                | Exon24 | Y1853_L1854delinsX | stopgain SNV         | rs80357629       | deleterious          |
|       |     | 41197783 | 41197783 | C                | T                | Exon24 | R1835Q             | nonsynonymous SNV    |                  | VUS                  |
|       |     | 41197784 | 41197784 | G                | A                | Exon24 | R1835X             | stopgain SNV         | rs41293465       | deleterious          |
|       |     | 41209079 | 41209079 | -                | G                | Exon20 | Q1756fs            | frameshift insertion |                  | deleterious          |
|       |     | 41209133 | 41209133 | C                | T                | Exon20 | G1738E             | nonsynonymous SNV    | rs80357450       | VUS                  |
|       |     | 41215363 | 41215366 | TTTC             | -                | Exon19 | 1726_1727del       | frameshift deletion  | rs80357975       | deleterious          |
|       |     | 41215947 | 41215947 | C                | T                | Exon18 | R1699Q             | nonsynonymous SNV    | rs41293459       | missense deleterious |
|       |     | 41219628 | 41219628 | T                | C                | Exon17 | T1691A             | nonsynonymous SNV    |                  | VUS                  |
|       |     | 41219694 | 41219694 | C                | A                | Exon17 | A1669S             | nonsynonymous SNV    | rs80357087       | VUS                  |
|       |     | 41222975 | 41222975 | C                | T                | Exon16 | M1652I             | nonsynonymous SNV    | rs1799967        | polymorphic          |
|       |     | 41223021 | 41223021 | G                | A                | Exon16 | P1637L             | nonsynonymous SNV    | rs80357048       | VUS                  |
|       |     | 41223094 | 41223094 | T                | C                | Exon16 | S1613G             | nonsynonymous SNV    | rs1799966        | polymorphic          |
|       |     | 41223156 | 41223156 | T                | C                | Exon16 | N1592S             | nonsynonymous SNV    |                  | VUS                  |
|       |     | 41226348 | 41226348 | C                | T                | Exon15 | E1559K             | nonsynonymous SNV    | rs80356988       | VUS                  |
|       |     | 41226488 | 41226488 | C                | A                | Exon15 | S1512I             | nonsynonymous SNV    | rs1800744        | polymorphic          |
|       |     | 41242963 | 41242963 | G                | A                | Exon12 | Q1395X             | stopgain SNV         | rs80357260       | deleterious          |
|       |     | 41243014 | 41243014 | C                | G                | Exon12 | V1378L             | nonsynonymous SNV    | rs28897690       | VUS                  |
|       |     | 41243017 | 41243017 | T                | G                | Exon12 | S1377R             | nonsynonymous SNV    |                  | VUS                  |
|       |     | 41243480 | 41243483 | TTGA             | -                | Exon11 | 1355_1356del       | frameshift deletion  | rs80357508       | deleterious          |
|       |     | 41243509 | 41243509 | T                | C                | Exon11 | R1347G             | nonsynonymous SNV    | rs28897689       | VUS                  |
|       |     | 41243512 | 41243512 | C                | T                | Exon11 | E1346K             | nonsynonymous SNV    | rs80357407       | VUS                  |
|       |     | 41243513 | 41243513 | T                | -                | Exon11 | E1345fs            | frameshift deletion  | rs80357711       | deleterious          |
|       |     | 41243789 | 41243792 | AGAC             | -                | Exon11 | 1252_1253del       | frameshift deletion  | rs80357868       | deleterious          |
|       |     | 41243800 | 41243800 | C                | A                | Exon11 | E1250X             | stopgain SNV         | rs28897686       | deleterious          |
|       |     | 41243800 | 41243800 | C                | T                | Exon11 | E1250K             | nonsynonymous SNV    | rs28897686       | polymorphic          |
|       |     | 41243835 | 41243835 | G                | A                | Exon11 | P1238L             | nonsynonymous SNV    | rs28897688       | VUS                  |
|       |     | 41243840 | 41243840 | A                | C                | Exon11 | N1236K             | nonsynonymous SNV    | rs28897687       | VUS                  |
|       |     | 41243908 | 41243908 | C                | T                | Exon11 | E1214K             | nonsynonymous SNV    | rs80356923       | VUS                  |
|       |     | 41244000 | 41244000 | T                | C                | Exon11 | K1183R             | nonsynonymous SNV    | rs16942          | polymorphic          |
|       |     | 41244252 | 41244252 | G                | A                | Exon11 | P1099L             | nonsynonymous SNV    | rs80357201       | polymorphic          |
|       |     | 41244429 | 41244429 | C                | T                | Exon11 | S1040N             | nonsynonymous SNV    | rs4986852        | VUS                  |
|       |     | 41244435 | 41244435 | T                | C                | Exon11 | E1038G             | nonsynonymous SNV    | rs16941          | polymorphic          |
|       |     | 41244495 | 41244495 | -                | TCTCA            | Exon11 | N1018fs            | frameshift insertion | rs80357856       | deleterious          |

| Gene  | Chr | Start    | Stop     | Reference Allele | Alternate Allele | Exon   | Protein Change | Type                 | Rsid (dbSNP 132) | Classification       |
|-------|-----|----------|----------|------------------|------------------|--------|----------------|----------------------|------------------|----------------------|
|       |     | 41244524 | 41244524 | C                | T                | Exon11 | M1008I         | nonsynonymous SNV    | rs1800704        | polymorphic          |
|       |     | 41244526 | 41244526 | T                | C                | Exon11 | M1008V         | nonsynonymous SNV    | rs56321129       | VUS                  |
|       |     | 41244557 | 41244557 | -                | TT               | Exon11 | N997fs         | frameshift insertion | rs80357829       | deleterious          |
|       |     | 41244740 | 41244740 | A                | C                | Exon11 | D936E          | nonsynonymous SNV    |                  | VUS                  |
|       |     | 41244787 | 41244787 | G                | A                | Exon11 | Q921X          | stopgain SNV         | rs80357377       | deleterious          |
|       |     | 41244936 | 41244936 | G                | A                | Exon11 | P871L          | nonsynonymous SNV    | rs799917         | polymorphic          |
|       |     | 41244951 | 41244951 | C                | T                | Exon11 | R866H          | nonsynonymous SNV    | rs80356911       | VUS                  |
|       |     | 41245027 | 41245027 | G                | A                | Exon11 | R841W          | nonsynonymous SNV    | rs1800709        | VUS                  |
|       |     | 41245073 | 41245073 | G                | -                | Exon11 | D825fs         | frameshift deletion  | rs80357970       | deleterious          |
|       |     | 41245091 | 41245091 | G                | -                | Exon11 | S819fs         | frameshift deletion  | rs80357669       | deleterious          |
|       |     | 41245120 | 41245120 | T                | A                | Exon11 | N810Y          | nonsynonymous SNV    | rs28897682       | VUS                  |
|       |     | 41245233 | 41245233 | A                | G                | Exon11 | V772A          | nonsynonymous SNV    | rs80357467       | VUS                  |
|       |     | 41245471 | 41245471 | C                | T                | Exon11 | D693N          | nonsynonymous SNV    | rs4986850        | polymorphic          |
|       |     | 41245477 | 41245477 | T                | -                | Exon11 | R691fs         | frameshift deletion  | rs80357688       | deleterious          |
|       |     | 41245513 | 41245513 | T                | A                | Exon11 | K679X          | stopgain SNV         | rs80357082       | deleterious          |
|       |     | 41245546 | 41245546 | G                | A                | Exon11 | L668F          | nonsynonymous SNV    | rs80357250       | VUS                  |
|       |     | 41245683 | 41245683 | G                | C                | Exon11 | A622G          | nonsynonymous SNV    | rs56039126       | VUS                  |
|       |     | 41245707 | 41245707 | T                | G                | Exon11 | K614T          | nonsynonymous SNV    |                  | VUS                  |
|       |     | 41245722 | 41245725 | TTCT             | -                | Exon11 | 608_609del     | frameshift deletion  | rs80357952       | deleterious          |
|       |     | 41245861 | 41245861 | G                | A                | Exon11 | Q563X          | stopgain SNV         | rs80356898       | deleterious          |
|       |     | 41245981 | 41245981 | A                | C                | Exon11 | L523V          | nonsynonymous SNV    |                  | VUS                  |
|       |     | 41245992 | 41245992 | T                | -                | Exon11 | K519fs         | frameshift deletion  | rs80357662       | deleterious          |
|       |     | 41246061 | 41246061 | C                | T                | Exon11 | R496H          | nonsynonymous SNV    | rs28897677       | polymorphic          |
|       |     | 41246481 | 41246481 | T                | C                | Exon11 | Q356R          | nonsynonymous SNV    | rs1799950        | polymorphic          |
|       |     | 41246812 | 41246812 | A                | C                | Exon11 | L246V          | nonsynonymous SNV    | rs28897675       | VUS                  |
|       |     | 41247911 | 41247911 | T                | G                | Exon10 | T208P          | nonsynonymous SNV    |                  | VUS                  |
|       |     | 41256153 | 41256153 | C                | A                | Exon7  | E143X          | stopgain SNV         | rs80356991       | deleterious          |
|       |     | 41256155 | 41256155 | G                | T                | Exon7  | P142H          | nonsynonymous SNV    | rs55971303       | VUS                  |
|       |     | 41258486 | 41258486 | C                | A                | Exon5  | D67Y           | nonsynonymous SNV    | rs80357102       | VUS                  |
|       |     | 41258504 | 41258504 | A                | C                | Exon5  | C61G           | nonsynonymous SNV    | rs28897672       | missense deleterious |
|       |     | 41276046 | 41276046 | T                | A                | Exon2  | E23V           | nonsynonymous SNV    |                  | VUS                  |
|       |     | 41276080 | 41276080 | G                | A                | Exon2  | Q12X           | stopgain SNV         | rs80357134       | deleterious          |
|       |     | 41276113 | 41276113 | T                | C                | Exon2  | M1V            | nonsynonymous SNV    | rs80357287       | missense deleterious |
| BRCA2 | 13  | 32893291 | 32893291 | G                | T                | Exon3  | E49X           | stopgain SNV         | rs80358435       | deleterious          |
|       |     | 32899275 | 32899275 | G                | -                | Exon4  | A127fs         | frameshift deletion  |                  | deleterious          |

| Gene | Chr | Start    | Stop     | Reference Allele | Alternate Allele | Exon   | Protein Change | Type                 | Rsid (dbSNP 132) | Classification |
|------|-----|----------|----------|------------------|------------------|--------|----------------|----------------------|------------------|----------------|
|      |     | 32903605 | 32903606 | TG               | -                | Exon8  | 219_220del     | frameshift deletion  |                  | deleterious    |
|      |     | 32906640 | 32906640 | A                | -                | Exon10 | E342fs         | frameshift deletion  |                  | deleterious    |
|      |     | 32907487 | 32907488 | TT               | -                | Exon10 | 624_625del     | frameshift deletion  |                  | deleterious    |
|      |     | 32911298 | 32911301 | AAAC             | -                | Exon11 | 936_937del     | frameshift deletion  | rs80359351       | deleterious    |
|      |     | 32911389 | 32911390 | CT               | -                | Exon11 | 966_966del     | frameshift deletion  |                  | deleterious    |
|      |     | 32911562 | 32911563 | AT               | -                | Exon11 | 1024_1024del   | frameshift deletion  |                  | deleterious    |
|      |     | 32912090 | 32912091 | TG               | -                | Exon11 | 1200_1200del   | frameshift deletion  | rs80359391       | deleterious    |
|      |     | 32912338 | 32912339 | TG               | -                | Exon11 | 1282_1283del   | frameshift deletion  |                  | deleterious    |
|      |     | 32912702 | 32912706 | TCAAA            | -                | Exon11 | 1404_1405del   | frameshift deletion  |                  | deleterious    |
|      |     | 32912887 | 32912891 | ATTAC            | -                | Exon11 | 1465_1467del   | frameshift deletion  |                  | deleterious    |
|      |     | 32912964 | 32912967 | TGAA             | -                | Exon11 | 1491_1492del   | frameshift deletion  | rs80359452       | deleterious    |
|      |     | 32913703 | 32913706 | TACT             | -                | Exon11 | 1737_1738del   | frameshift deletion  |                  | deleterious    |
|      |     | 32913729 | 32913729 | -                | T                | Exon11 | S1746fs        | frameshift insertion |                  | deleterious    |
|      |     | 32913778 | 32913779 | TC               | -                | Exon11 | 1762_1763del   | frameshift deletion  |                  | deleterious    |
|      |     | 32913837 | 32913838 | AA               | -                | Exon11 | 1782_1782del   | frameshift deletion  |                  | deleterious    |
|      |     | 32914356 | 32914356 | C                | A                | Exon11 | S1955X         | stopgain SNV         | rs80358815       | deleterious    |
|      |     | 32914529 | 32914529 | A                | T                | Exon11 | K2013X         | stopgain SNV         | rs80358840       | deleterious    |
|      |     | 32929058 | 32929059 | TC               | -                | Exon14 | 2356_2357del   | frameshift deletion  |                  | deleterious    |
|      |     | 32932023 | 32932023 | A                | -                | Exon16 | I2588fs        | frameshift deletion  | rs80359679       | deleterious    |
|      |     | 32937672 | 32937672 | T                | C                | Exon18 |                | splicing             |                  | deleterious    |
|      |     | 32954222 | 32954222 | C                | T                | Exon24 | Q3066X         | stopgain SNV         | rs80359180       | deleterious    |
|      |     | 32969001 | 32969002 | TG               | -                | Exon25 | 3144_3145del   | frameshift deletion  |                  | deleterious    |
|      |     | 32972626 | 32972626 | A                | T                | Exon27 | K3326X         | stopgain SNV         | rs11571833       | polymorphic    |
|      |     | 32893271 | 32893271 | A                | G                | Exon3  | Y42C           | nonsynonymous SNV    | rs4987046        | VUS            |
|      |     | 32906480 | 32906480 | A                | C                | Exon10 | N289H          | nonsynonymous SNV    | rs766173         | polymorphic    |
|      |     | 32906480 | 32906480 | A                | G                | Exon10 | N289D          | nonsynonymous SNV    | rs766173         | polymorphic    |
|      |     | 32906593 | 32906593 | C                | A                | Exon10 | S326R          | nonsynonymous SNV    | rs28897706       | VUS            |
|      |     | 32906655 | 32906655 | A                | G                | Exon10 | Q347R          | nonsynonymous SNV    | rs55800493       | VUS            |
|      |     | 32906729 | 32906729 | A                | C                | Exon10 | N372H          | nonsynonymous SNV    | rs144848         | polymorphic    |
|      |     | 32906934 | 32906934 | T                | G                | Exon10 | L440R          | nonsynonymous SNV    |                  | VUS            |
|      |     | 32906949 | 32906949 | C                | T                | Exon10 | S445F          | nonsynonymous SNV    |                  | VUS            |
|      |     | 32907000 | 32907000 | A                | G                | Exon10 | E462G          | nonsynonymous SNV    | rs56403624       | VUS            |
|      |     | 32907129 | 32907129 | T                | C                | Exon10 | I505T          | nonsynonymous SNV    | rs28897708       | VUS            |
|      |     | 32910812 | 32910812 | A                | G                | Exon11 | T774A          | nonsynonymous SNV    | rs55968715       | VUS            |
|      |     | 32911246 | 32911246 | C                | G                | Exon11 | N918K          | nonsynonymous SNV    |                  | VUS            |

| Gene | Chr | Start    | Stop     | Reference Allele | Alternate Allele | Exon   | Protein Change | Type              | Rsid (dbSNP 132) | Classification |
|------|-----|----------|----------|------------------|------------------|--------|----------------|-------------------|------------------|----------------|
|      |     | 32911295 | 32911295 | G                | A                | Exon11 | D935N          | nonsynonymous SNV | rs28897716       | polymorphic    |
|      |     | 32911539 | 32911539 | A                | C                | Exon11 | E1016A         | nonsynonymous SNV |                  | VUS            |
|      |     | 32911547 | 32911547 | C                | G                | Exon11 | L1019V         | nonsynonymous SNV | rs55638633       | VUS            |
|      |     | 32911565 | 32911565 | A                | G                | Exon11 | K1025E         | nonsynonymous SNV | rs80358550       | VUS            |
|      |     | 32912060 | 32912060 | C                | T                | Exon11 | R1190W         | nonsynonymous SNV | rs80358604       | VUS            |
|      |     | 32912361 | 32912361 | G                | A                | Exon11 | C1290Y         | nonsynonymous SNV | rs41293485       | polymorphic    |
|      |     | 32912553 | 32912553 | C                | T                | Exon11 | T1354M         | nonsynonymous SNV | rs80358656       | VUS            |
|      |     | 32912703 | 32912703 | C                | T                | Exon11 | S1404L         | nonsynonymous SNV | rs41293489       | VUS            |
|      |     | 32912733 | 32912733 | C                | T                | Exon11 | T1414M         | nonsynonymous SNV | rs70953664       | VUS            |
|      |     | 32912750 | 32912750 | G                | T                | Exon11 | D1420Y         | nonsynonymous SNV | rs28897727       | polymorphic    |
|      |     | 32912829 | 32912829 | T                | C                | Exon11 | I1446T         | nonsynonymous SNV |                  | VUS            |
|      |     | 32913077 | 32913077 | G                | A                | Exon11 | G1529R         | nonsynonymous SNV | rs28897728       | VUS            |
|      |     | 32913154 | 32913154 | T                | G                | Exon11 | S1554R         | nonsynonymous SNV |                  | VUS            |
|      |     | 32913562 | 32913562 | A                | C                | Exon11 | K1690N         | nonsynonymous SNV | rs56087561       | VUS            |
|      |     | 32913804 | 32913804 | G                | A                | Exon11 | G1771D         | nonsynonymous SNV | rs80358755       | polymorphic    |
|      |     | 32913962 | 32913962 | A                | C                | Exon11 | N1824H         | nonsynonymous SNV |                  | VUS            |
|      |     | 32914127 | 32914127 | G                | A                | Exon11 | E1879K         | nonsynonymous SNV | rs55996097       | VUS            |
|      |     | 32914163 | 32914163 | G                | A                | Exon11 | A1891T         | nonsynonymous SNV |                  | VUS            |
|      |     | 32914196 | 32914196 | G                | A                | Exon11 | D1902N         | nonsynonymous SNV | rs4987048        | polymorphic    |
|      |     | 32914218 | 32914218 | A                | G                | Exon11 | D1909G         | nonsynonymous SNV | rs80358798       | VUS            |
|      |     | 32914236 | 32914236 | C                | T                | Exon11 | T1915M         | nonsynonymous SNV | rs4987117        | VUS            |
|      |     | 32914592 | 32914592 | C                | T                | Exon11 | R2034C         | nonsynonymous SNV | rs1799954        | VUS            |
|      |     | 32914668 | 32914668 | G                | A                | Exon11 | S2059N         | nonsynonymous SNV |                  | VUS            |
|      |     | 32914814 | 32914814 | C                | T                | Exon11 | R2108C         | nonsynonymous SNV | rs55794205       | VUS            |
|      |     | 32914815 | 32914815 | G                | A                | Exon11 | R2108H         | nonsynonymous SNV | rs35029074       | VUS            |
|      |     | 32915105 | 32915105 | G                | A                | Exon11 | V2205M         | nonsynonymous SNV | rs80358889       | VUS            |
|      |     | 32915198 | 32915198 | G                | A                | Exon11 | E2236K         | nonsynonymous SNV | rs41293503       | VUS            |
|      |     | 32929387 | 32929387 | T                | C                | Exon14 | V2466A         | nonsynonymous SNV | rs169547         | polymorphic    |
|      |     | 32930634 | 32930634 | G                | A                | Exon15 | R2502H         | nonsynonymous SNV | rs56070345       | VUS            |
|      |     | 32930673 | 32930673 | C                | T                | Exon15 | T2515I         | nonsynonymous SNV | rs28897744       | polymorphic    |
|      |     | 32930694 | 32930694 | C                | T                | Exon15 | S2522F         | nonsynonymous SNV | rs80358985       | VUS            |
|      |     | 32936757 | 32936757 | G                | A                | Exon17 | E2635K         | nonsynonymous SNV |                  | VUS            |
|      |     | 32936778 | 32936778 | T                | G                | Exon17 | F2642V         | nonsynonymous SNV |                  | VUS            |
|      |     | 32937488 | 32937488 | G                | T                | Exon18 | A2717S         | nonsynonymous SNV | rs28897747       | polymorphic    |
|      |     | 32937489 | 32937489 | C                | T                | Exon18 | A2717V         | nonsynonymous SNV |                  | VUS            |



| Gene          | Chr | Start    | Stop     | Reference Allele | Alternate Allele | Exon   | Protein Change | Type                | Rsid (dbSNP 132) | Classification       |
|---------------|-----|----------|----------|------------------|------------------|--------|----------------|---------------------|------------------|----------------------|
|               |     | 32937516 | 32937516 | A                | T                | Exon18 | Y2726F         | nonsynonymous SNV   | rs80359064       | VUS                  |
|               |     | 32937521 | 32937521 | G                | A                | Exon18 | V2728I         | nonsynonymous SNV   | rs28897749       | VUS                  |
|               |     | 32937663 | 32937663 | T                | G                | Exon18 | M2775R         | nonsynonymous SNV   | rs80359073       | VUS                  |
|               |     | 32937672 | 32937672 | T                | C                | Exon18 |                | splicing            |                  | deleterious          |
|               |     | 32945172 | 32945172 | A                | C                | Exon20 | E2856A         | nonsynonymous SNV   | rs11571747       | polymorphic          |
|               |     | 32953549 | 32953549 | G                | T                | Exon22 | K2950N         | nonsynonymous SNV   | rs28897754       | VUS                  |
|               |     | 32953550 | 32953550 | G                | A                | Exon22 | A2951T         | nonsynonymous SNV   | rs11571769       | polymorphic          |
|               |     | 32954180 | 32954180 | C                | T                | Exon24 | R3052W         | nonsynonymous SNV   | rs45580035       | missense deleterious |
|               |     | 32954275 | 32954275 | A                | T                | Exon24 | K3083N         | nonsynonymous SNV   | rs80359191       | VUS                  |
|               |     | 32972471 | 32972471 | T                | G                | Exon27 | L3274W         | nonsynonymous SNV   |                  | VUS                  |
|               |     | 32972739 | 32972739 | A                | G                | Exon27 | I3363M         | nonsynonymous SNV   | rs80358390       | VUS                  |
|               |     | 32972804 | 32972804 | G                | A                | Exon27 | R3385H         | nonsynonymous SNV   | rs80358398       | VUS                  |
|               |     | 32972852 | 32972852 | C                | T                | Exon27 | T3401M         | nonsynonymous SNV   | rs55853199       | VUS                  |
|               |     | 32972884 | 32972884 | A                | G                | Exon27 | I3412V         | nonsynonymous SNV   | rs1801426        | VUS                  |
| <i>RAD51C</i> | 17  | 56787288 | 56787288 | T                | -                | Exon5  | R258fs         | frameshift deletion |                  | deleterious          |
|               |     | 56772522 | 56772522 | G                | A                | Exon2  | A126T          | nonsynonymous SNV   | rs61758784       | VUS                  |
|               |     | 56772540 | 56772540 | A                | C                | Exon2  | T132P          | nonsynonymous SNV   |                  | VUS                  |
|               |     | 56772543 | 56772543 | C                | A                | Exon2  | Q133K          | nonsynonymous SNV   |                  | VUS                  |
|               |     | 56774110 | 56774110 | A                | G                | Exon3  | E154G          | nonsynonymous SNV   |                  | VUS                  |
|               |     | 56774116 | 56774116 | T                | G                | Exon3  | V156G          | nonsynonymous SNV   |                  | VUS                  |
|               |     | 56774121 | 56774121 | A                | T                | Exon3  | I158F          | nonsynonymous SNV   |                  | VUS                  |
|               |     | 56774124 | 56774124 | G                | T                | Exon3  | D159Y          | nonsynonymous SNV   |                  | VUS                  |
|               |     | 56787298 | 56787298 | T                | G                | Exon5  | L262V          | nonsynonymous SNV   |                  | VUS                  |
|               |     | 56787304 | 56787304 | G                | A                | Exon5  | G264S          | nonsynonymous SNV   |                  | missense deleterious |
|               |     | 56798128 | 56798128 | A                | G                | Exon6  | T287A          | nonsynonymous SNV   | rs28363317       | missense deleterious |

Some mutations occurred in multiple patients, but are noted only once in this table.

**Table S2. Catalog of somatic variants found among N=279 epithelial ovarian cancer patients**

| Gene     | Chr      | Start    | Stop     | Reference Allele | Alternate Allele | Exon    | Protein Change | Function (GVS)Type    | rsid (dbSNP 132) | Classification        |
|----------|----------|----------|----------|------------------|------------------|---------|----------------|-----------------------|------------------|-----------------------|
| BRCA1    | 17       | 41223094 | 41223094 | T                | C                | Exon 9  | S430G          | NON-SYNONYMOUS CODING | rs1799966        | polymorphic           |
|          |          | 41226402 | 41226402 | C                | A                | Exon 10 | E358*          | STOP GAINED           | rs80357248       | deleterious           |
|          |          | 41243941 | 41243941 | G                | A                | Exon 14 | R1203*         | STOP GAINED           | rs62625308       | deleterious           |
|          |          | 41244000 | 41244000 | T                | C                | Exon 14 | K1183R         | NON-SYNONYMOUS CODING | rs16942          | polymorphic           |
|          |          | 41244429 | 41244429 | C                | T                | Exon 14 | S1040N         | NON-SYNONYMOUS CODING | rs4986852        | VUS                   |
|          |          | 41244435 | 41244435 | T                | C                | Exon 14 | E1038G         | NON-SYNONYMOUS CODING | rs16941          | polymorphic           |
|          |          | 41244936 | 41244936 | G                | A                | Exon 14 | P871L          | NON-SYNONYMOUS CODING | rs799917         | polymorphic           |
|          |          | 41244936 | 41244936 | G                | A                | Exon 14 | P871L          | NON-SYNONYMOUS CODING | rs799917         | polymorphic           |
|          |          | 41245467 | 41245467 | C                | T                | Exon 14 | S694N          | NON-SYNONYMOUS CODING | -                | polymorphic           |
|          |          | 41258471 | 41258471 | A                | G                | -       | -              | SPLICE SITE DONOR     | rs80358026       | deleterious           |
|          |          | 41245278 | 41245279 | AC               | A                | Exon 14 | -              | FRAME SHIFT           | rs80357583       | deleterious           |
|          |          | 41245990 | 41245991 | TC               | T                | Exon 14 | -              | FRAME SHIFT           | -                | deleterious           |
|          |          | 41246824 | 41246825 | TG               | T                | Exon 14 | -              | FRAME SHIFT           | -                | deleterious           |
|          |          | BRCA2    | 13       | 32905116         | 32905116         | G       | A              | Exon 9                | A248T            | NON-SYNONYMOUS CODING |
| 32906729 | 32906729 |          |          | A                | C                | exon10  | N372H          | NON-SYNONYMOUS CODING | rs144848         | polymorphic           |
| 32906729 | 32906729 |          |          | A                | C                | Exon 10 | N372H          | NON-SYNONYMOUS CODING | rs144848         | polymorphic           |
| 32911247 | 32911247 |          |          | G                | A                | Exon 11 | E919K          | NON-SYNONYMOUS CODING | -                | polymorphic           |
| 32911325 | 32911325 |          |          | A                | C                | Exon 11 | K945Q          | NON-SYNONYMOUS CODING | -                | polymorphic           |
| 32912381 | 32912381 |          |          | A                | G                | Exon 11 | N1297D         | NON-SYNONYMOUS CODING | -                | missense deleterious  |
| 32914236 | 32914236 |          |          | C                | T                | Exon 11 | T1915M         | NON-SYNONYMOUS CODING | rs4987117        | VUS                   |
| 32914542 | 32914542 |          |          | A                | T                | Exon 11 | K2017I         | NON-SYNONYMOUS CODING | -                | missense deleterious  |
| 32918697 | 32918697 |          |          | G                | T                | Exon 12 | E2282*         | STOP GAINED           | -                | deleterious           |
| 32936688 | 32936688 |          |          | C                | T                | Exon 17 | P2612S         | NON-SYNONYMOUS CODING | -                | polymorphic           |
| 32937582 | 32937582 |          |          | G                | A                | Exon 18 | G2748D         | NON-SYNONYMOUS CODING | rs80359071       | missense deleterious  |
| RAD51C   | 17       | 56809843 | 56809844 | AG               | A                | -       | -              | SPLICE SITE ACCEPTOR  | -                | deleterious           |

Some mutations occurred in multiple patients, but are noted only once in this table.

**Table S3. Comparison of the clinical characteristics of HRD patients**

|                                                                | Germline<br>(n=82) | Somatic<br>(n=9) | Methylated<br>(n=50) |
|----------------------------------------------------------------|--------------------|------------------|----------------------|
| <b>Age at Diagnosis, years</b>                                 |                    |                  |                      |
| Mean (SD)                                                      | 58.3 (10.4)        | 60.0 (9.3)       | 58.4 (11.3)          |
| <b>Histology</b>                                               |                    |                  |                      |
| High grade serous                                              | 68 (83%)           | 7 (78%)          | 41 (82%)             |
| High grade endometrioid                                        | 3 (4%)             | 2 (22%)          | 5 (10%)              |
| Low grade endometrioid                                         | 1 (1%)             | 0                | 1 (2%)               |
| Clear Cell                                                     | 4 (5%)             | 0                | 1 (2%)               |
| Low grade Serous                                               | 0                  | 0                | 2 (4%)               |
| Mucinous                                                       | 0                  | 0                | 0                    |
| Other/Unknown                                                  | 6 (7%)             | 0                | 0                    |
| <b>Grade</b>                                                   |                    |                  |                      |
| High                                                           | 77 (98%)           | 9 (100%)         | 47 (94%)             |
| Low                                                            | 2 (3%)             | 0                | 3 (6%)               |
| Unknown                                                        | 3                  | 0                | 0                    |
| <b>First Degree Family History of Breast or Ovarian Cancer</b> |                    |                  |                      |
| No                                                             | 49 (60%)           | 7 (78%)          | 46 (92%)             |
| Yes                                                            | 33 (40%)           | 2 (22%)          | 4 (8%)               |
| <b>First Degree Family History of Ovarian Cancer</b>           |                    |                  |                      |
| No                                                             | 73 (89%)           | 9 (100%)         | 48 (96%)             |
| Yes                                                            | 9 (11%)            | 0                | 2 (4%)               |

**Table S4. Analysis of time to recurrence by HRD phenotypes**

|                       | All patients |                 |                   |         |                    |         | High grade serous |            |                  |         |                    |         |
|-----------------------|--------------|-----------------|-------------------|---------|--------------------|---------|-------------------|------------|------------------|---------|--------------------|---------|
|                       | N            | N (%)<br>events | HR (95% CI)       | P value | Covariate-adjusted |         | N                 | N(%)events | HR (95% CI)      | P value | Covariate adjusted |         |
|                       |              |                 |                   |         | HR (95% CI)        | P value |                   |            |                  |         | HR (95%CI)         | P value |
| By HRD                |              |                 |                   |         |                    |         |                   |            |                  |         |                    |         |
| NAD                   | 213          | 150 (70%)       | ref               | 0.71    | ref                | 0.30    | 146               | 118 (81)   | ref              |         | ref                | 0.55    |
| HRD                   | 142          | 106 (75%)       | 1.05 (0.82,1.13)  |         | 0.87 (0.66, 1.13)  |         | 117               | 95 (81)    | 0.93 (0.71,1.21) | 0.58    | 0.92 (0.69,1.22)   |         |
| By Type of Alteration |              |                 |                   |         |                    |         |                   |            |                  |         |                    |         |
| None                  | 213          | 150 (70%)       | ref               | 0.31    | ref                | 0.44    | 146               | 118 (81)   | Ref              | 0.27    | Ref                | 0.34    |
| Germline mutation     | 81           | 57 (70%)        | 0.98 (0.72, 1.33) |         | 0.83 (0.60, 1.15)  |         | 67                | 53 (79)    | 0.90 (0.65,1.24) |         | 0.87 (0.62,1.23)   |         |
| Somatic mutation      | 9            | 5 (56%)         | 0.63 (0.26, 1.54) |         | 0.58 (0.23, 1.43)  |         | 7                 | 4 (57)     | 0.45 (0.16,1.21) |         | 0.49 (0.18,1.34)   |         |
| Methylation           | 50           | 43 (86%)        | 1.29 (0.92, 1.81) |         | 1.01 (0.69, 1.47)  |         | 41                | 37 (90)    | 1.15 (0.80,1.67) |         | 1.14 (0.76,1.69)   |         |
| By Germline Mutation  |              |                 |                   |         |                    |         |                   |            |                  |         |                    |         |
| Non-carrier           | 801          | 544 (68%)       | ref               | 0.55    | Ref                | 0.06    | 541               | 428 (79)   | Ref              | 0.66    | Ref                | 0.54    |
| <i>BRCA1</i>          | 29           | 23 (79%)        | 1.16 (0.77, 1.77) |         | 1.11 (0.72, 1.70)  |         | 26                | 21 (81)    | 0.88 (0.57,1.36) |         | 1.02 (0.65,1.60)   |         |
| <i>BRCA2</i>          | 27           | 17 (63%)        | 0.80 (0.49, 1.30) |         | 0.58 (0.35, 0.94)  |         | 23                | 17 (74)    | 0.78 (0.48,1.26) |         | 0.73 (0.45, 1.19)  |         |
| <i>RAD51C</i>         | 23           | 15 (65%)        | 0.80 (0.48, 1.33) |         | 0.66 (0.39, 1.11)  |         | 18                | 15 (83)    | 0.86 (0.51,1.44) |         | 0.82 (0.49,1.38)   |         |

Women with VUS in any of the three genes were included in the non-HRD , non-carrier groups; results did not differ when these individuals were excluded from the analyses; adjusted results were adjusted for age at diagnosis, debulking status, stage, grade (low/high), ascites present at surgery, and menopausal status including categories for patients with missing data.
